# Supplementary material
Source: HighWire-hosted journal article supplement (https://jitc.bmj.com/content/11/2/e006164)
Supplement: inline-supplementary-material-1 [file inline-supplementary-material-1.pdf]

## Supplementary Figure legends

**Supplementary Fig. 1 Patient-derived glioblastoma neurospheres and cell lines have different sensitivity to oHSV infection and replication.** Human GBM neurospheres and cell lines were infected with oHSV-GFP at MOI=0.02 and analyzed at 16hr (**a**, representative histogram from triplicates) and 96hr (**b**) by flow cytometry (n=3) to quantify the % of GFP+ve infected cells.

**Supplementary Fig. 2 PKR, but not STING or TLR signaling controls oHSV sensitivity in GBM.** **a.** Confirmation of effectiveness of siRNA targeting PKR and STING. Shown are western blots of LN229 cells transfected with control scramble siRNA or PKR siRNA for 72hr. **b.** Representative fluorescent images of data shown in Fig 1a. LN229 cells transfected with control, STING or PKR siRNA, or treated with MyD88 inhibitor (NBP2-29328, 5 $\mu$ M) for 16hr and then infected with oHSV for another 72hr, MOI=0.02. **c.** Representative fluorescent microscopy (**c**) images and histogram (**d**) of GFP+ve infected U87 cells with siPKR transfection and oHSV-GFP infection at MOI=0.02. **e.** Quantification of live cell numbers after treatment with siRNA targeting PKR and infection with oHSV-GFP. Live tumor cell number was quantified by aqua live/dead staining and flow cytometry (**f**) (n=3). Error bars are s.d., Student's t test (\**p* value < 0.05).

**Supplementary Fig. 3 Genomic structure of oHSV virus designed to knock down PKR in infected tumor cells.** There is an insertion of shRNA targeting human PKR (oHSV-shPKR), or murine PKR (oHSV-mshPKR), or a scrambled control (oHSV-shCtl) within the ICP6 disrupted locus. Deletion of both the copies of ICP34.5 is depicted by triangles.

**Supplementary Fig. 4 oHSV-shPKR increases tumor lysis in both resistant and sensitive GBM cells.** LN229 cells and primary GBM cells (GBM28) were infected with oHSV-shCtl or oHSV-shPKR at MOI=0.05 (for LN229) or MOI=0.02 (for GBM28) for 72hr. Tumor cell lysis was monitored by flow cytometry analysis for live/dead staining (n=3). Error bars are s.d., Student's t test (\**p* value < 0.05).

**Supplementary Fig. 5 PKR regulates immune cell-mediated tumor cell lysis during oHSV treatment.** oHSV sensitive GBM28 or resistant LN229 cells were infected with oHSV (MOI=0.02) in the presence or absence of PBMCs (E:T=1:5) for 96hr. Tumor cell lysis was quantified with aqua live/dead staining (**a-b**).(n=3). Error bars are s.d., Student's t test (\**p* value < 0.05).

**Supplementary Fig. 6 oHSV-shPKR increases CD8 T cell activation and IFN $\gamma$  secretion during immune cell-mediated tumor cell lysis.** GSC20 cells were infected with oHSV-shCtl or oHSV-shPKR (MOI=0.02) and overlaid with or without PBMCs for 72hrs. CD8 T cell activation was analyzed by CD69

flow cytometry staining (**a**) (n=3). IFN $\gamma$  secretion in the co-culture was analyzed by ELISA (**b**) (n=3). Error bars are s.d., Student's t test (\**p* value < 0.05).

**Supplementary Fig. 7 oHSV-shPKR increases activity of antigen presenting cells.** PBMC-derived DCs cultured with GSC20 cells treated with oHSV-shPKR or oHSV-shCtl were analyzed for markers indicative of activation. A-b: representative dot blots and mean MFI of CD86 and HLADR on dendritic cells,  $\pm$  s.d (**b**, n=3/g) analyzed by flow cytometry. The apoptosis of dendritic cells was analyzed by Annexin-V/PI staining (**c-d**, representative dot plot, **n=3**). Error bars are s.d., Student's t test (\**p* value < 0.05).

**Supplementary Fig. 8 oHSV-shPKR increases antigen-specific cytotoxic T lymphocyte activation.** Representative dot blots of data quantified in Fig 3. Autologous T cells cultured with dendritic cells charged with treated gbm cell conditioned medium (as shown in in Fig.3c) were analyzed for activation markers by flow cytometry. **a.** dot blots of Flow cytometry analysis of CD69 on CD4 $^{+}$  and CD8 $^{+}$  T-cells cultured with dendritic cells. **b-c.** dot blots of Flow cytometry analysis of intracellular staining of effector molecules IFN $\gamma$  and TNF $\alpha$  in both CD8 $^{+}$  (**b**) and CD4 $^{+}$  (**c**). **d.** Anti-GBM and anti-viral specific CTLs were analyzed by EphA2-tetramer and HSV gB-tetramer staining. Flow cytometry dot plots are showed from one of triplicates.

**Supplementary Fig. 9 Tumor cell antigen release from infected GBM cells.** Western blot analysis of tumor antigen EphA2 in 5 $\times$  concentrated supernatant (20ul) from GSC20 and U251T3 cells infected with oHSV-shCtl or oHSV-shPKR.

**Supplementary Fig. 10 oHSV-mshPKR murine specific PKR regulating oHSV.** **a.** Three siRNAs against mouse PKR were designed and transfected into mouse glioma cells NP for 16hr and then infected with oHSV (MOI=0.02) for 72hr. The viability of tumor cells was analyzed by cell-titer glo assay (n=3). (**b**) PKR knockdown by oHSV-mshPKR in GL261N4 glioma cells. **b.** Murine siPKR3 sequence was used to construct oHSV-mshPKR. GL261N4 cells were infected with oHSV-mshPKR or oHSV-shCtl (MOI=1) for 48hr. Murine PKR knockdown was analyzed by qRT-PCR (n=3). **c-e.** GL261N4 and DB7 cells were infected with oHSV-mshPKR or oHSV-shCtl (MOI=0.02) for 96hr. oHSV-infected GBM cells were quantified by flow cytometry. Representative histograms are showed (**c**). Tumor cell lysis by oHSV-mshPKR in GL261N4 and DB7 cells was analyzed by Near-IR live/dead staining (**d-e**) (n=3). Error bars are s.d., Student's t test (\**p* value < 0.05).

**Supplementary Fig. 11 Single-cell RNA-seq of myeloid cells in GL261N4 tumor bearing mice treated with oHSV-mshPKR.** Murine GL261N4 tumors implanted in C57BL/6 mice were treated with oHSV-mshPKR or oHSV-shCtl. 5 days after treatment, CD45 $^{+}$  cells and CD45 $^{-}$  cells harvested from tumor-bearing mice underwent scRNA-seq analysis (n=5 mice/group). Annotation of

myeloid cell populations **(a)** and different cell types **(b)** within the myeloid cell population from tumor-bearing mice were assessed.

**Supplementary Fig. 12 Single-cell RNA-seq analysis of TGF $\beta$  signaling in different cell types found in human glioblastoma.** Analysis of TGF $\beta$  signaling in different cell types from scRNA-seq from a total of 3589 cells from 4 human GBM patients. (The raw scRNA-seq data are from Gephart Lab: Darmanis, S., Sloan, S.A., Croote, D., Mignardi, M., Chernikova, S., Samghabadi, P., Zhang, Y., Neff, N., Kowarsky, M., Caneda, C., Li, Gordon., Chang, S., Connolly, I.D., Li, Y., Barres, B., Gephart, M.H., Quake, S.R. Single-Cell RNAseq analysis of infiltrating neoplastic cells at the migrating front of human glioblastoma. 2017)

**Supplementary Fig. 13 TGF $\beta$  secretion from GBM28 cells after infection of oHSV-shPKR.** GBM28 cells were infected with oHSV-shPKR or oHSV-shCtl (MOI=0.05) for 48hr. TGF $\beta$  secretion was analyzed by ELISA (n=3). Error bars are s.d., Student's t test (\**p* value < 0.05).

**Supplementary Fig. 14 oHSV-mshPKR increases antigen specific T cells expansion. a.** GL261N4-OVA cells were infected with oHSV-mshPKR or oHSV-shCtl (MOI=0.05) for 24hr and then cocultured with OT-1 T cells (1:5) for 72hr. Flow cytometry analysis of live tumor cells by aqua live/dead staining gating on tumor cells only (n=3). **b-c.** PD1 expression in the cocultured CD8 T cells were analyzed by flow cytometry (n=3). Error bars are s.d., Student's t test (\**p* value < 0.05).

**Supplementary Fig. 15 oHSV-mshPKR increases MHC class I-bound SIINFEKL peptide from GL261N4-OVA cells.** GL261N4-OVA cells were infected with oHSV-shCtl or oHSV-mshPKR with MOI=0.5 for 72hr. MHC class I-bound SIINFEKL peptide in GL261N4-OVA cells was analyzed flow cytometry (n=3). Error bars are s.d., Student's t test (\**p* value < 0.05).

**Supplementary Table.1 siRNA and shRNA sequence used in the study.**

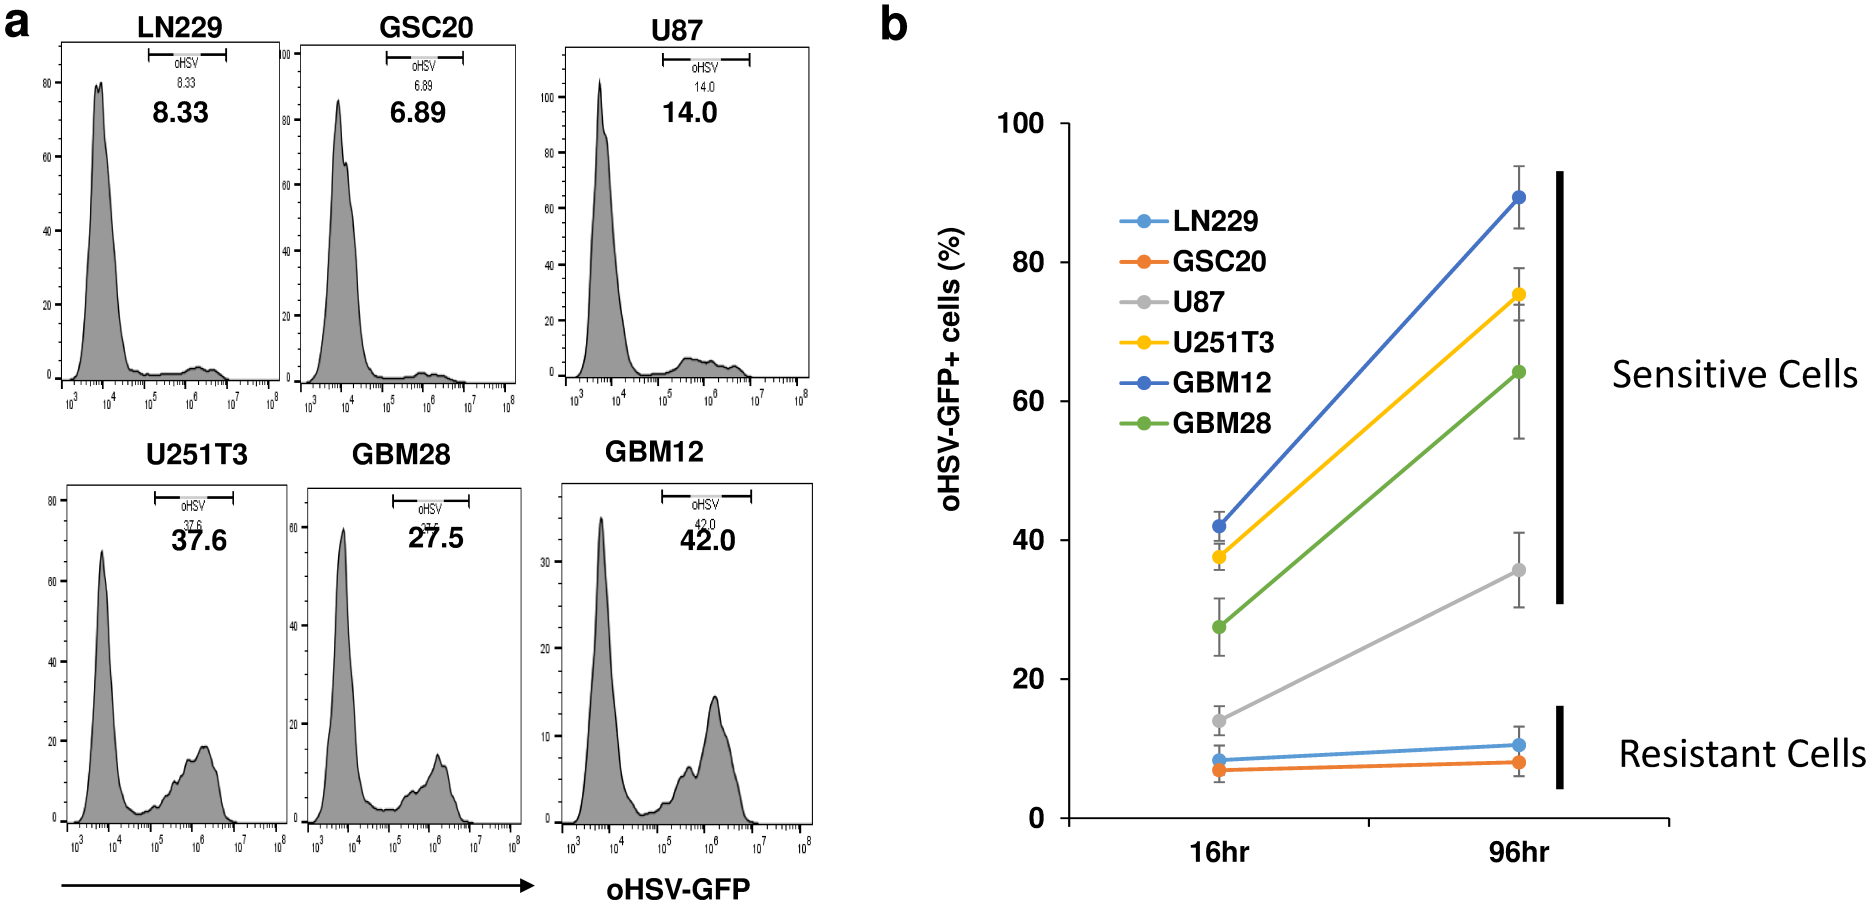

Supplementary Fig. 1

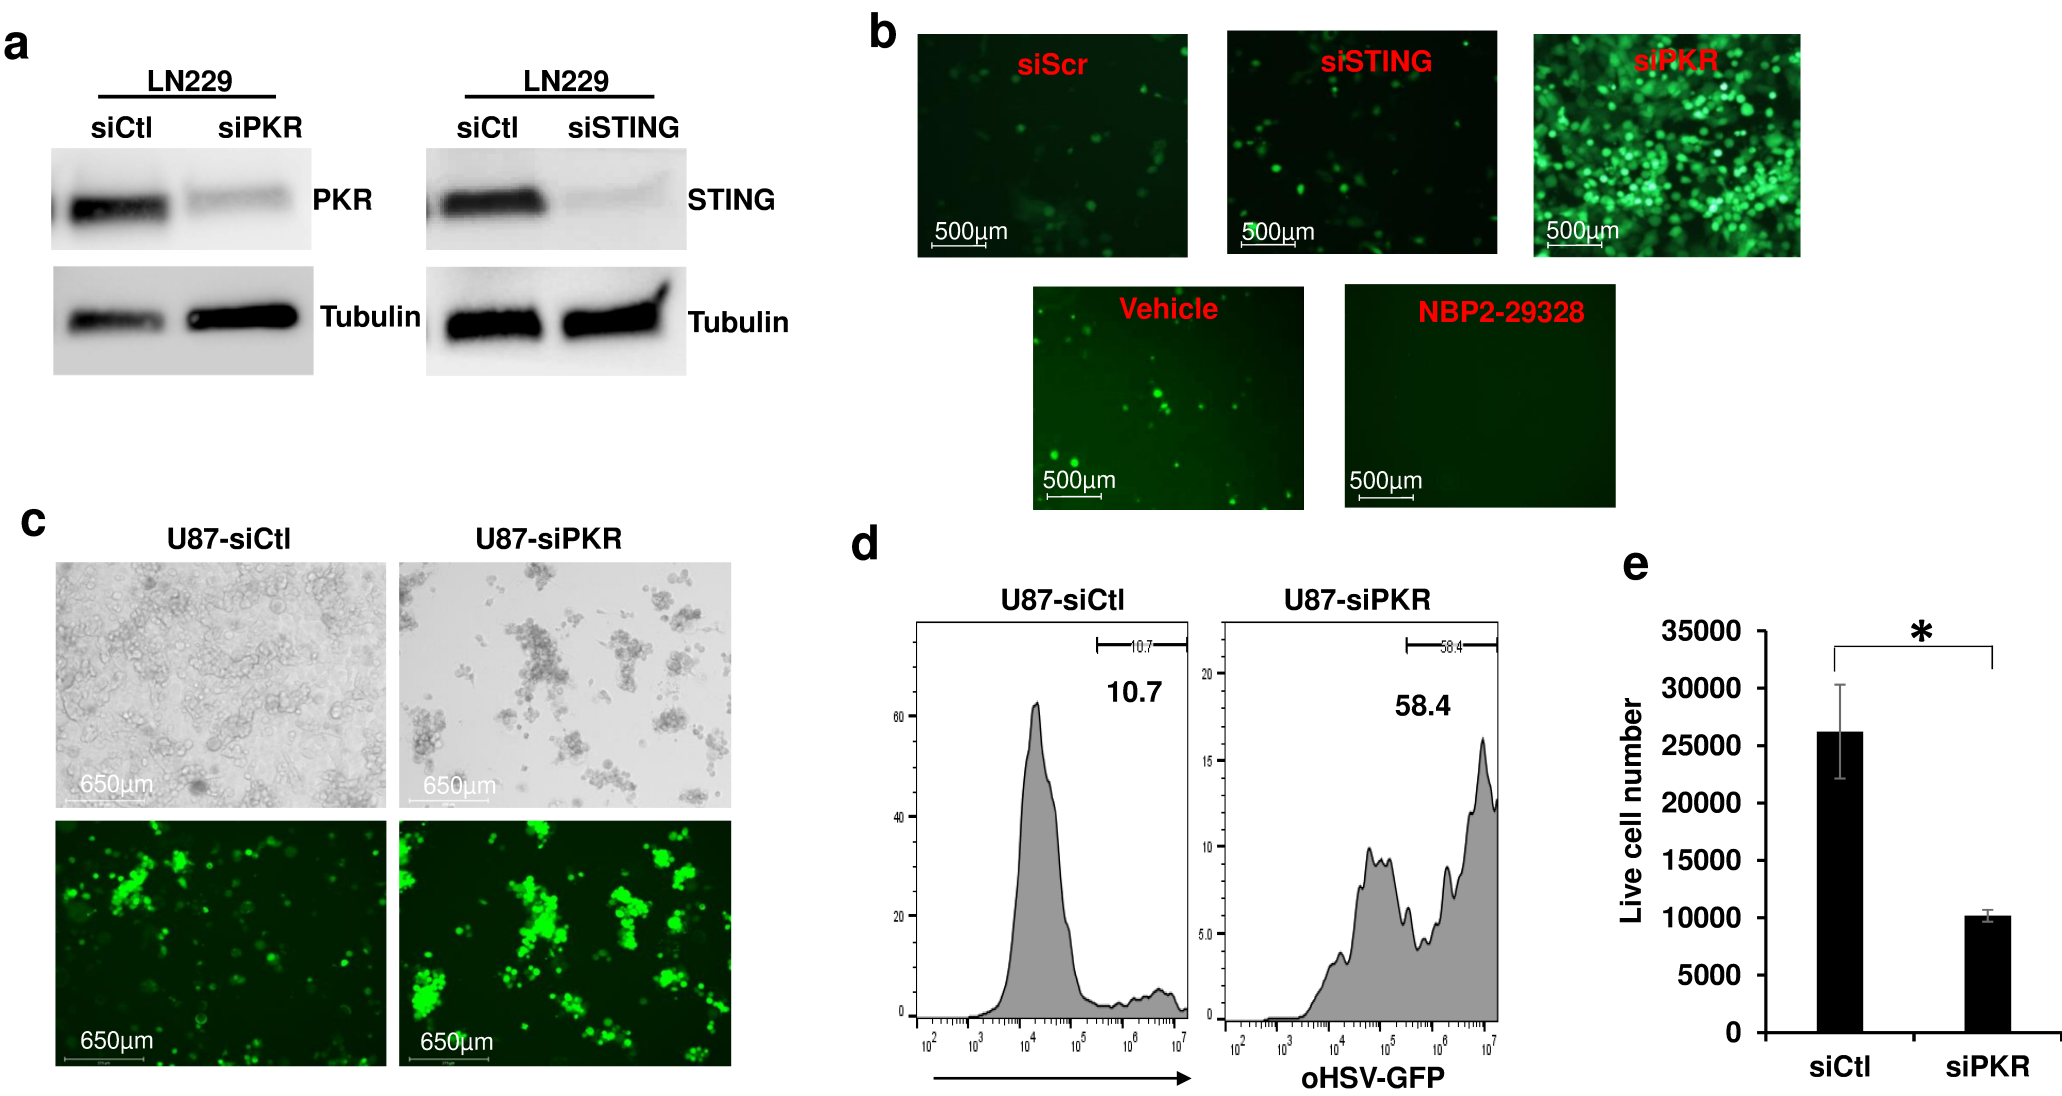

Supplementary Fig. 2

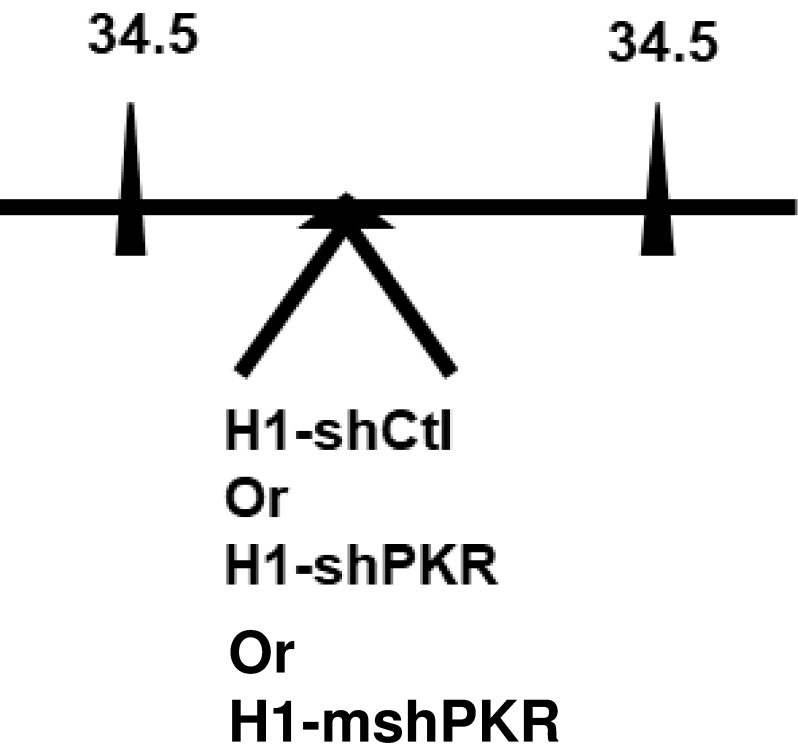

Supplementary Fig. 3

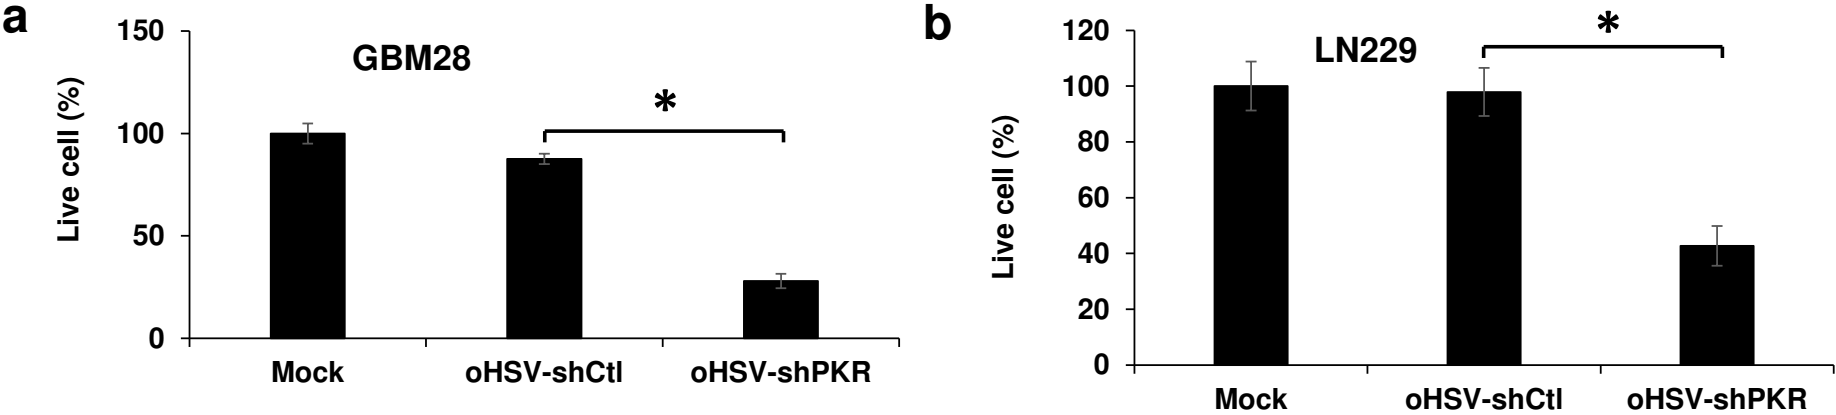

Supplementary Fig. 4

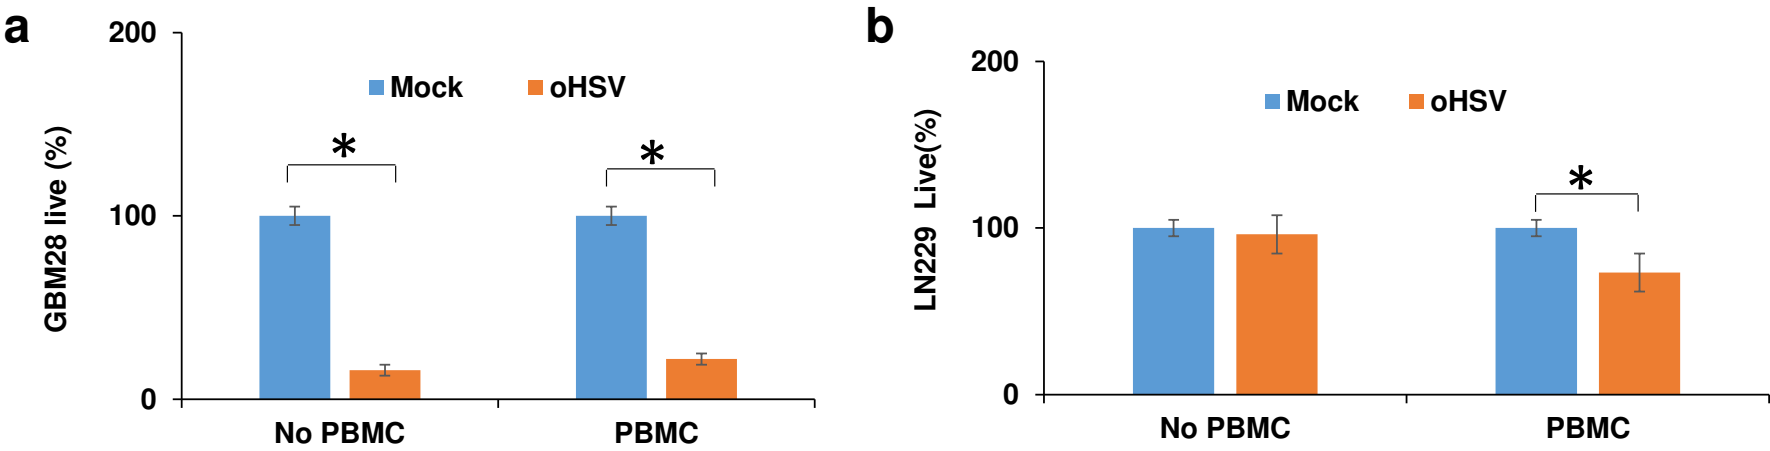

Supplementary Fig. 5



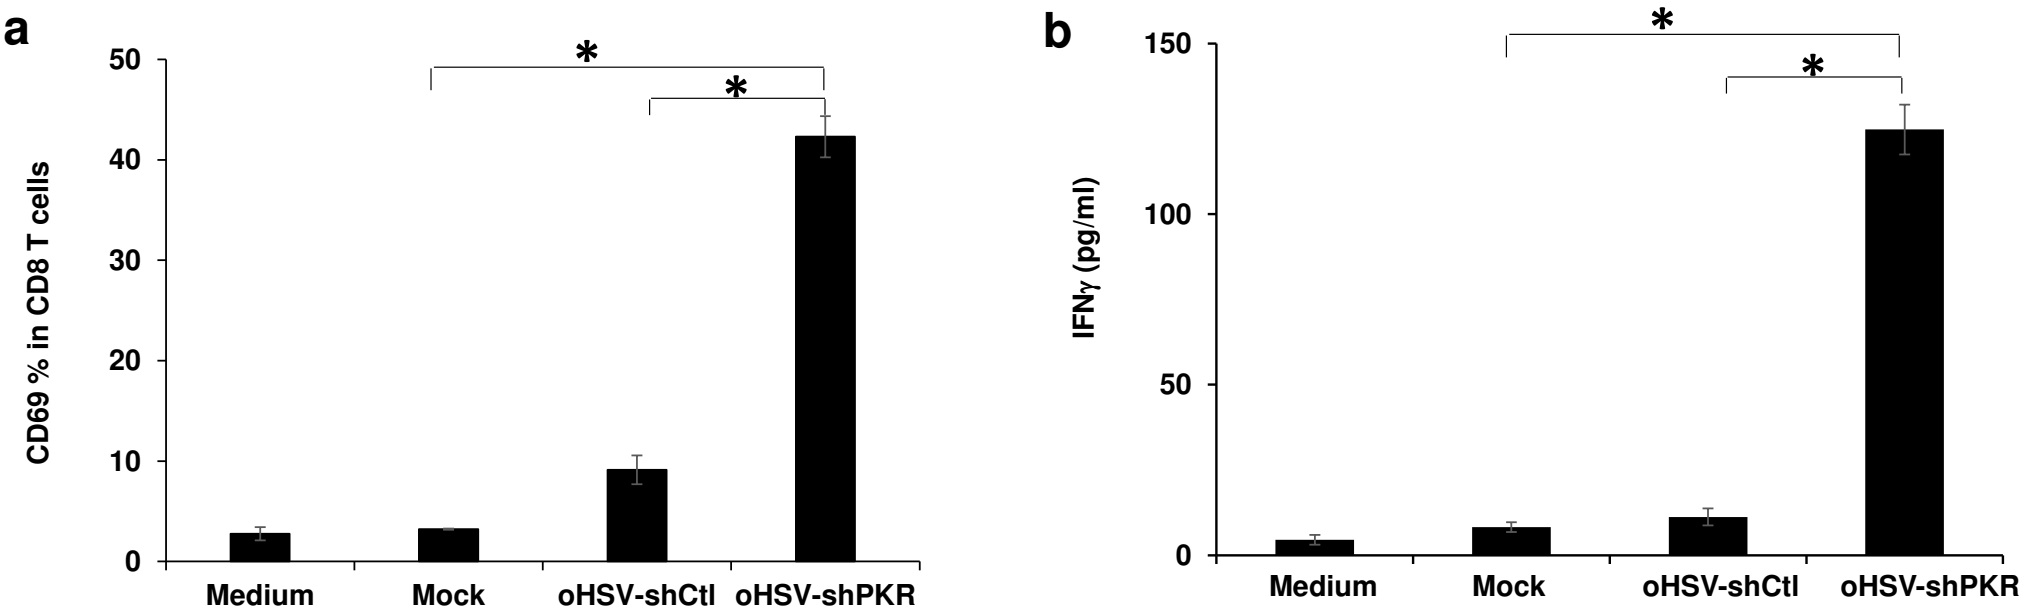

Supplementary Fig. 6

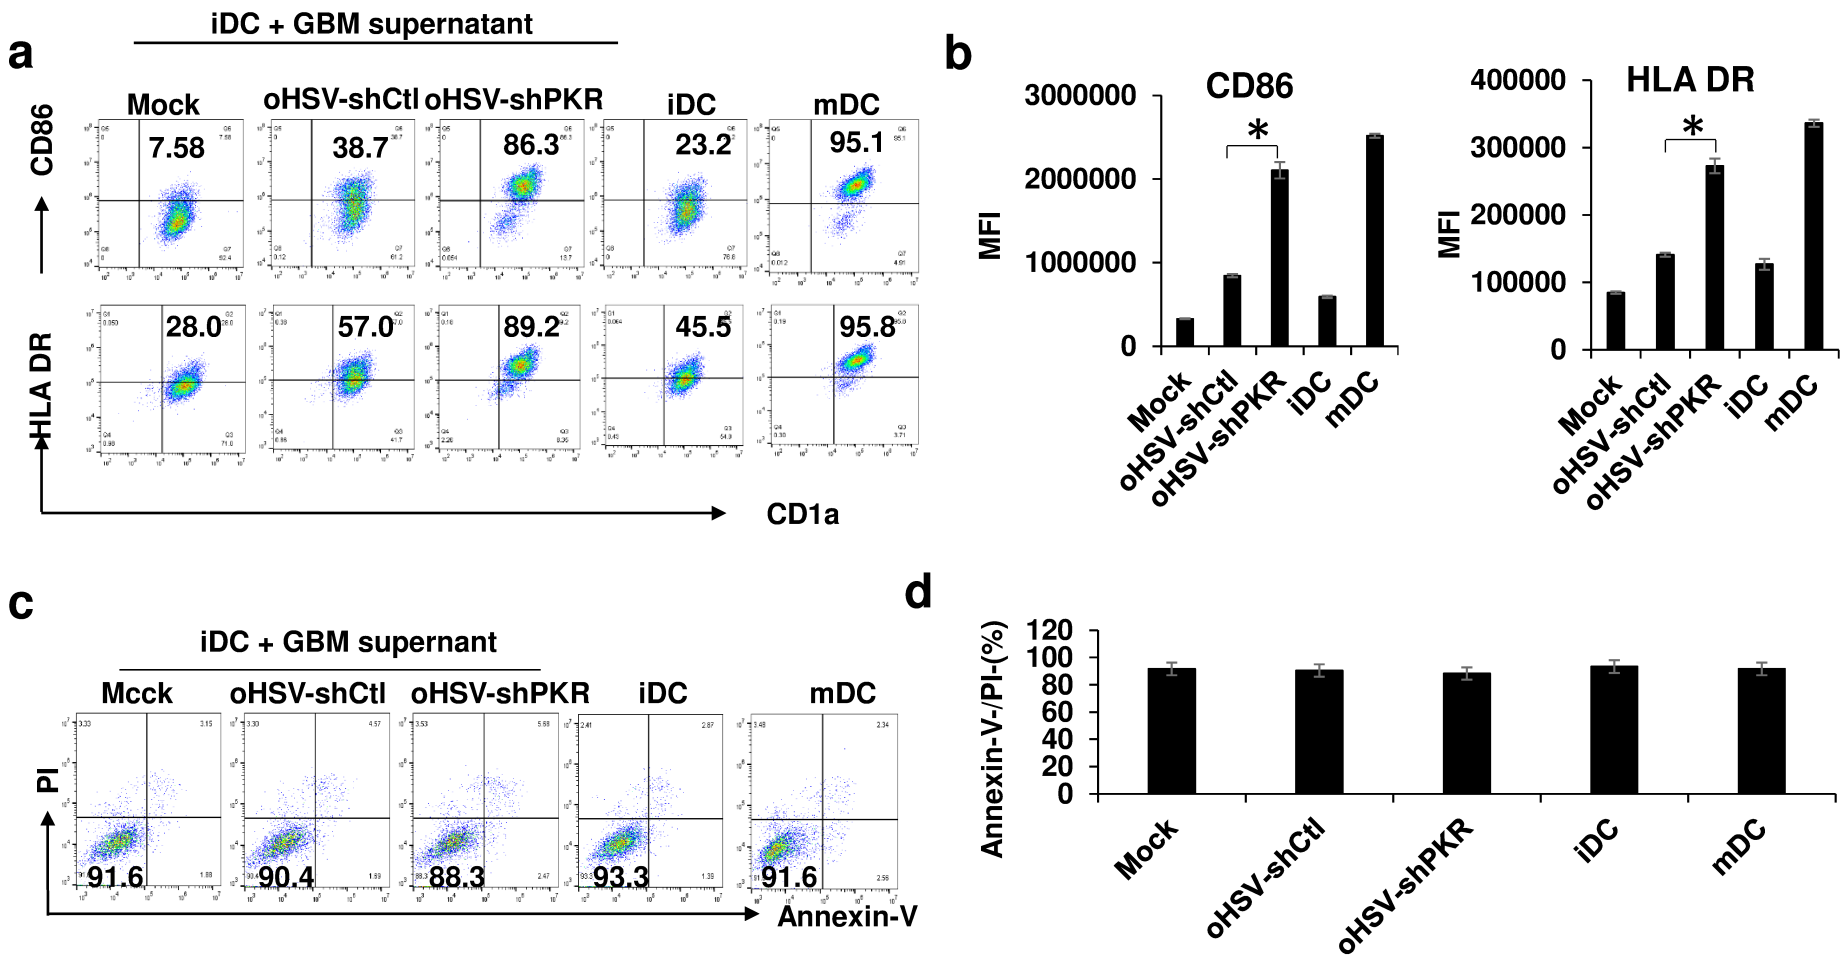

Supplementary Fig. 7

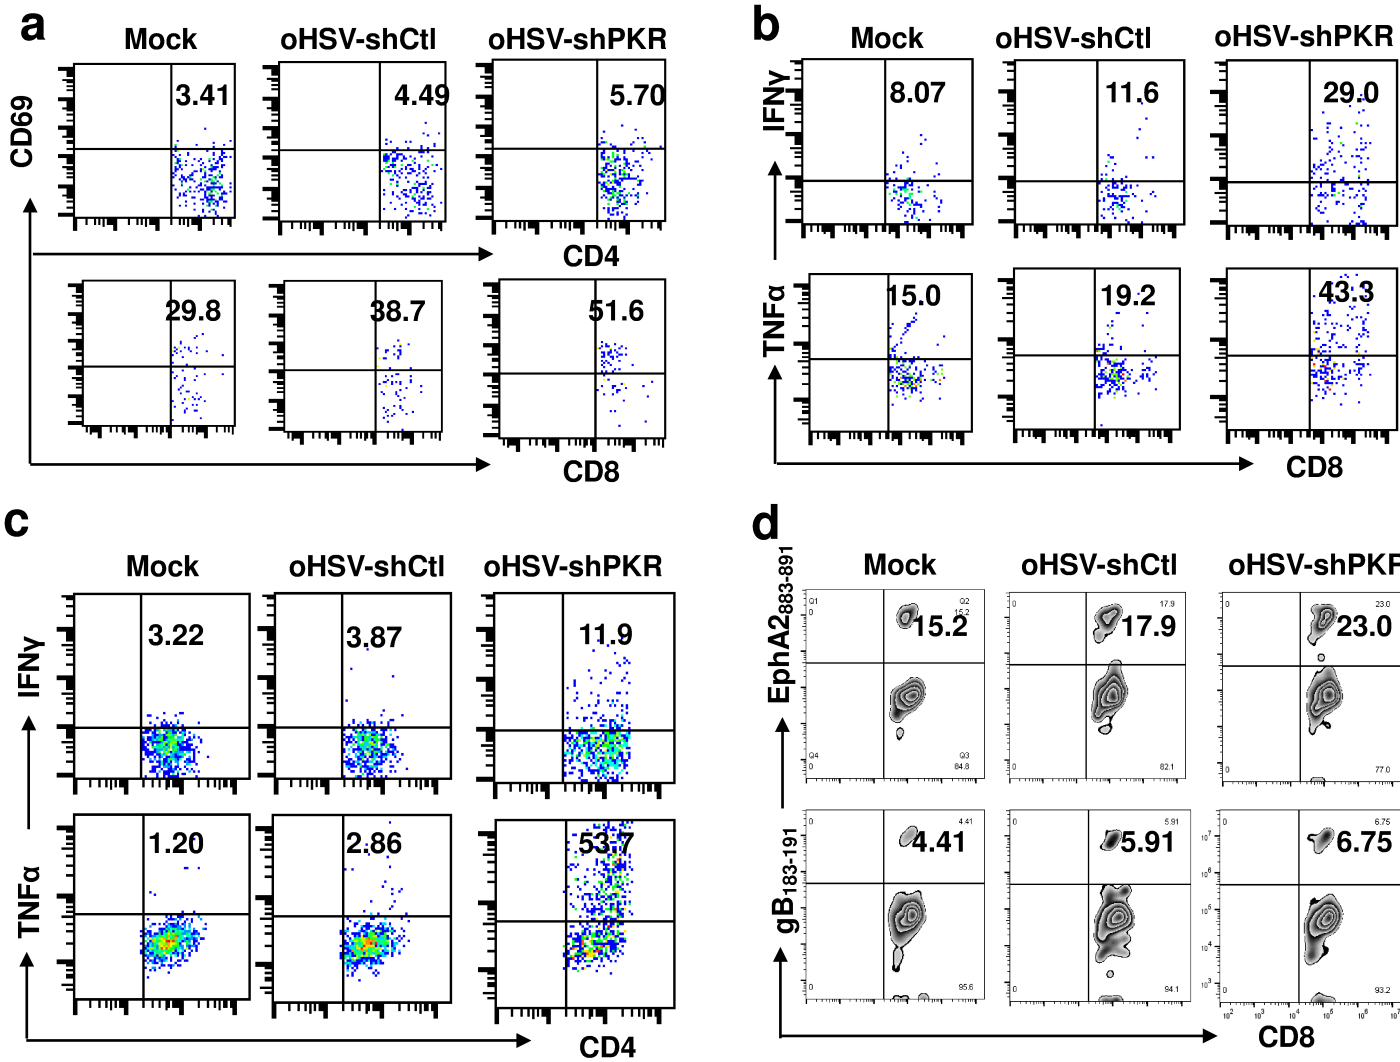

Supplementary Fig. 8

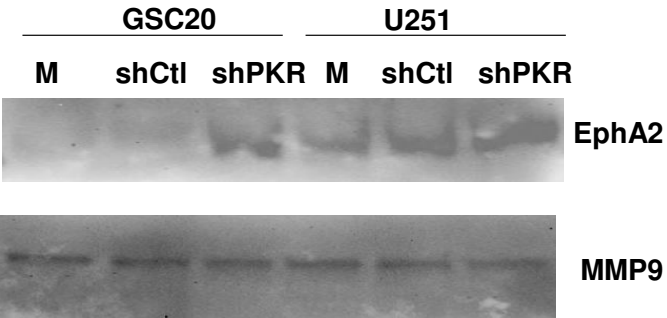

Supplementary Fig. 9

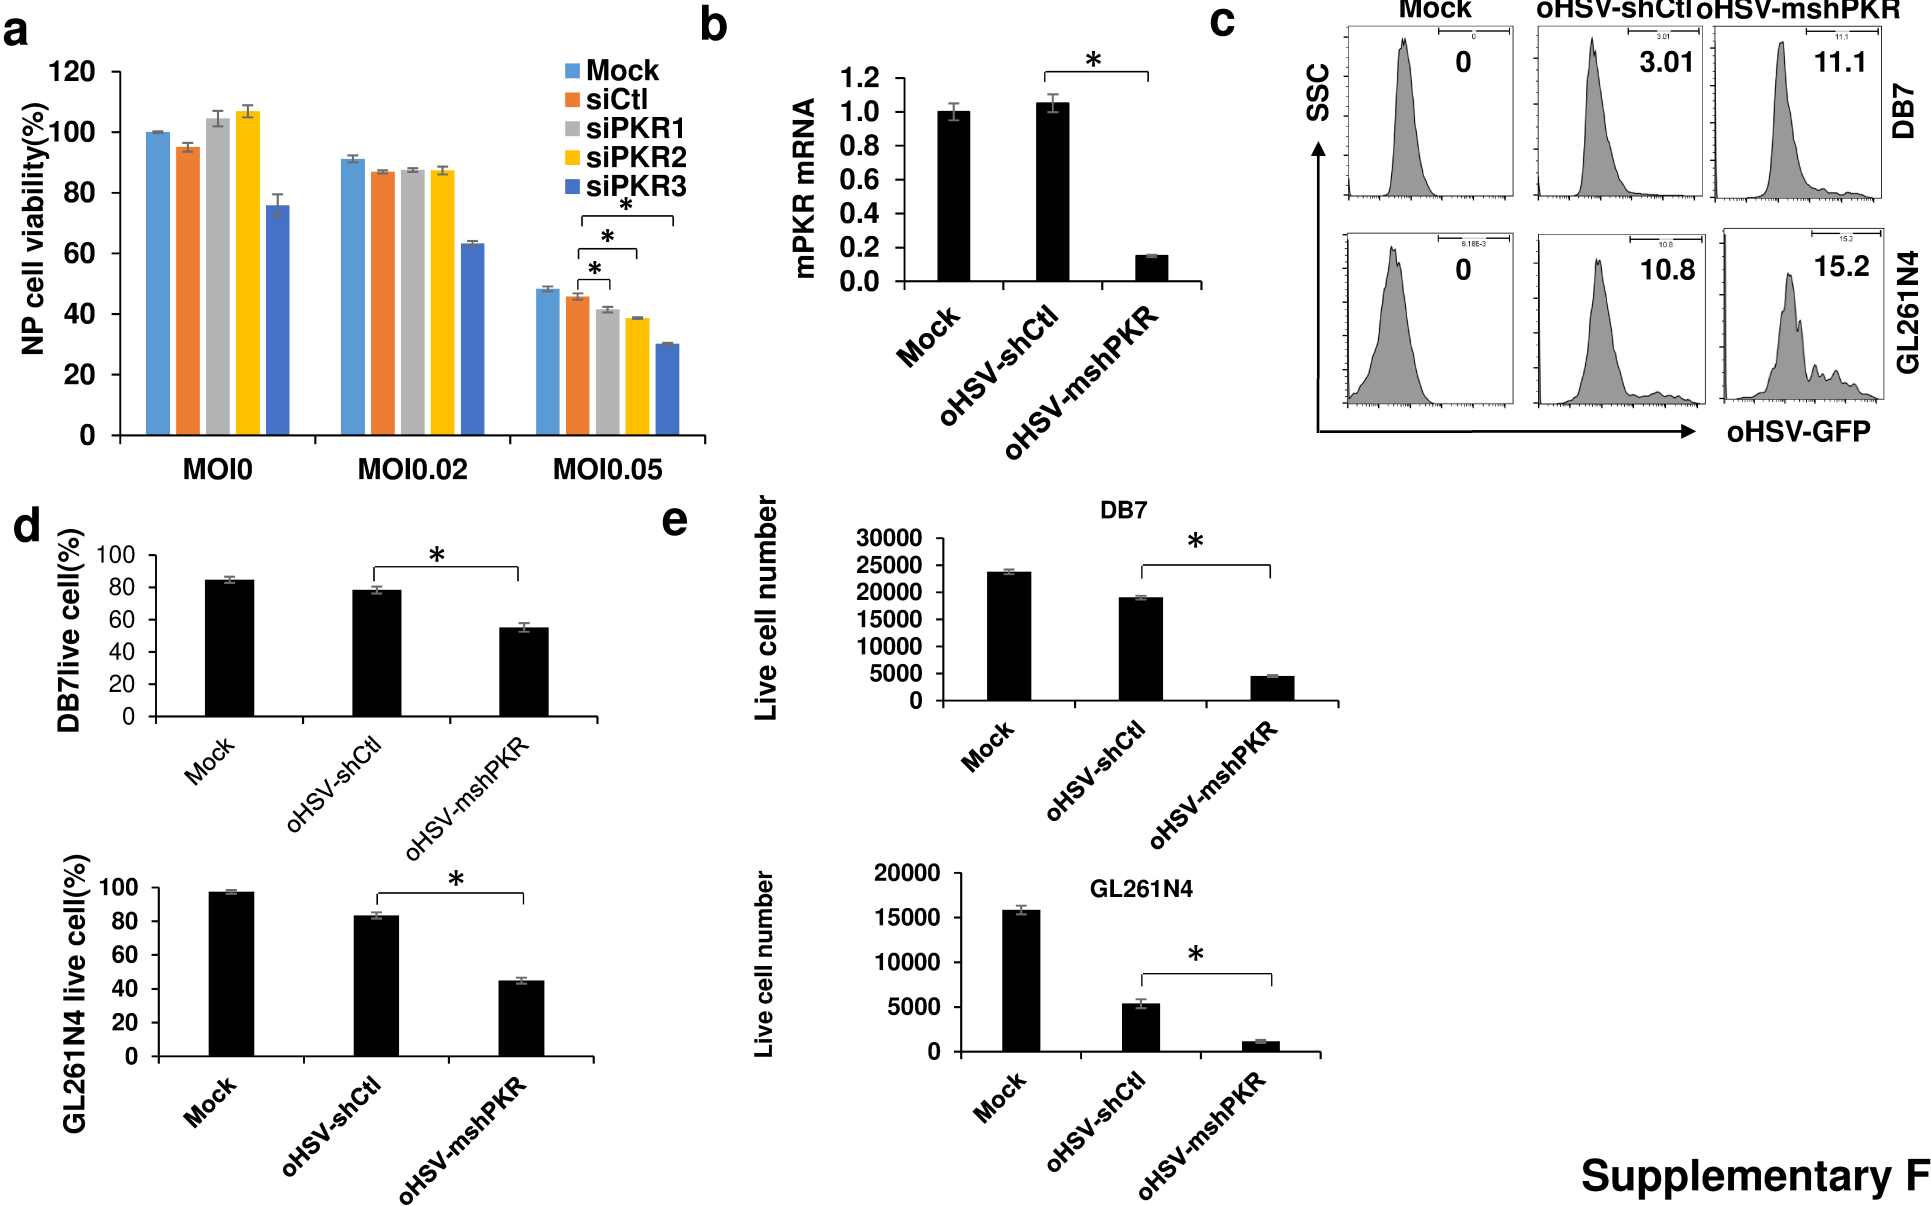

Supplementary Fig. 10

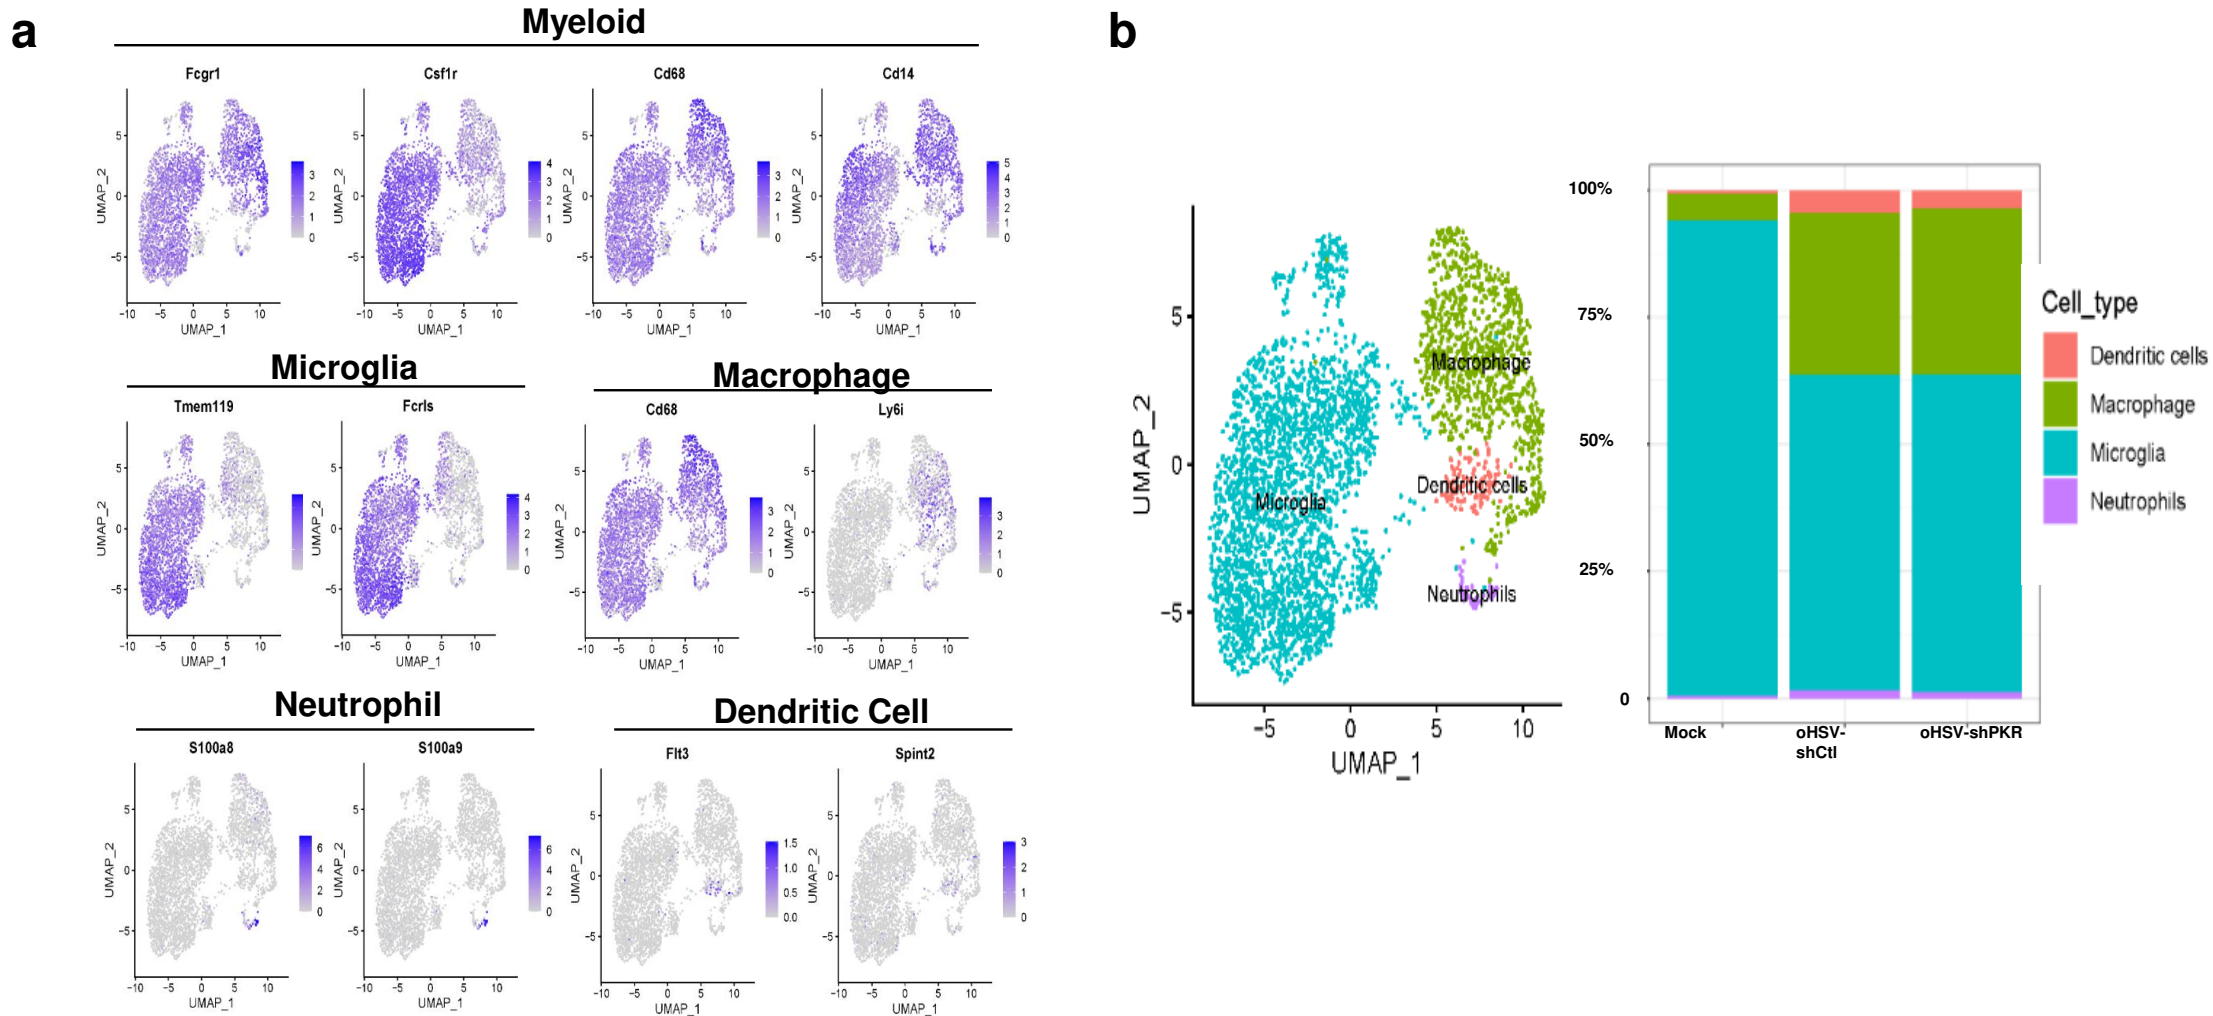

Supplementary Fig. 11

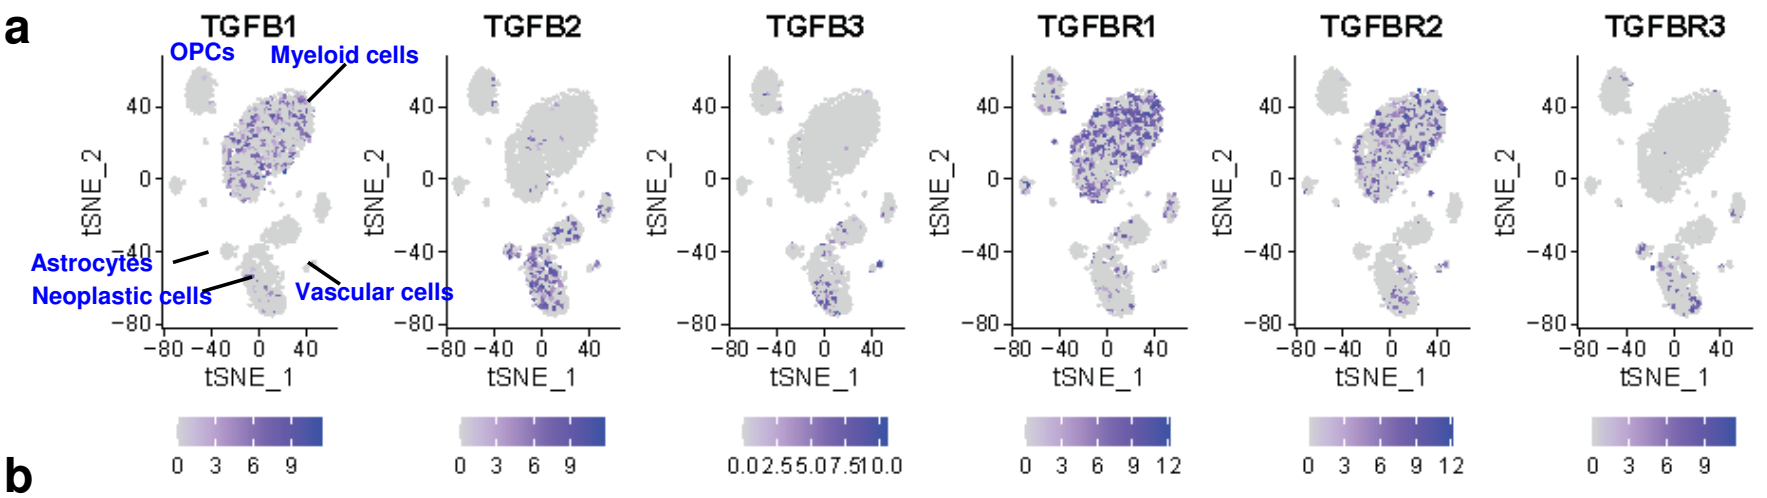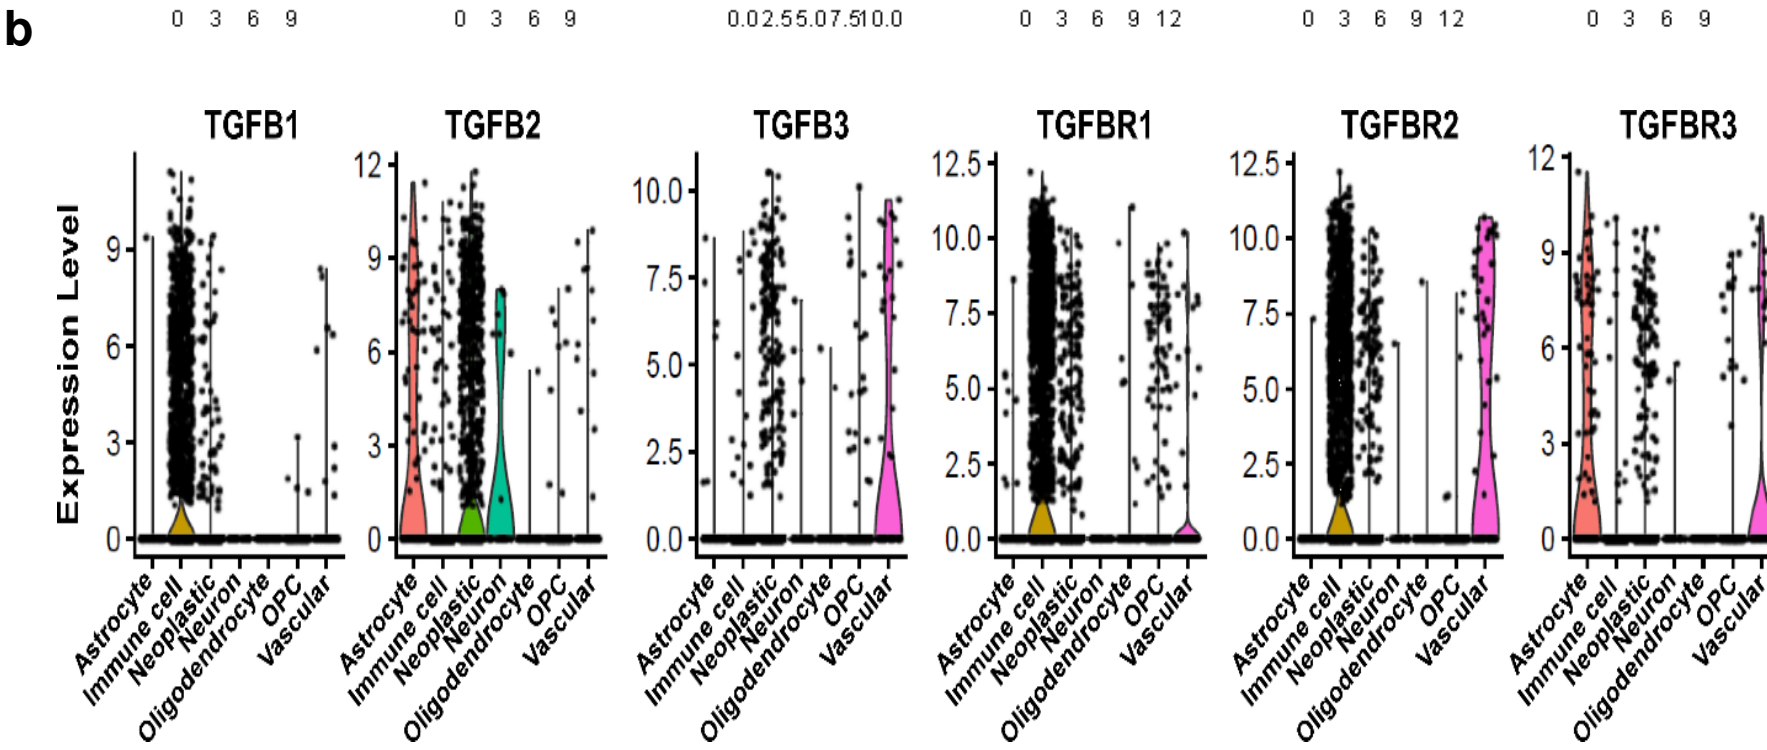

Supplementarv Fig. 12

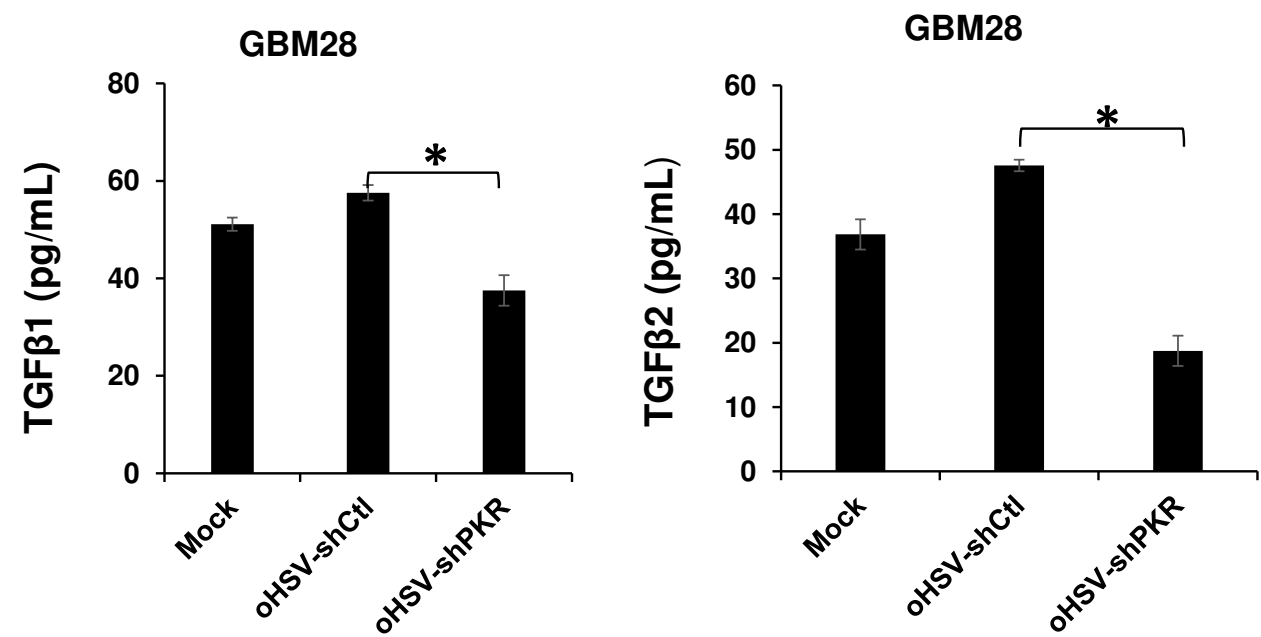

Supplementary Fig. 13



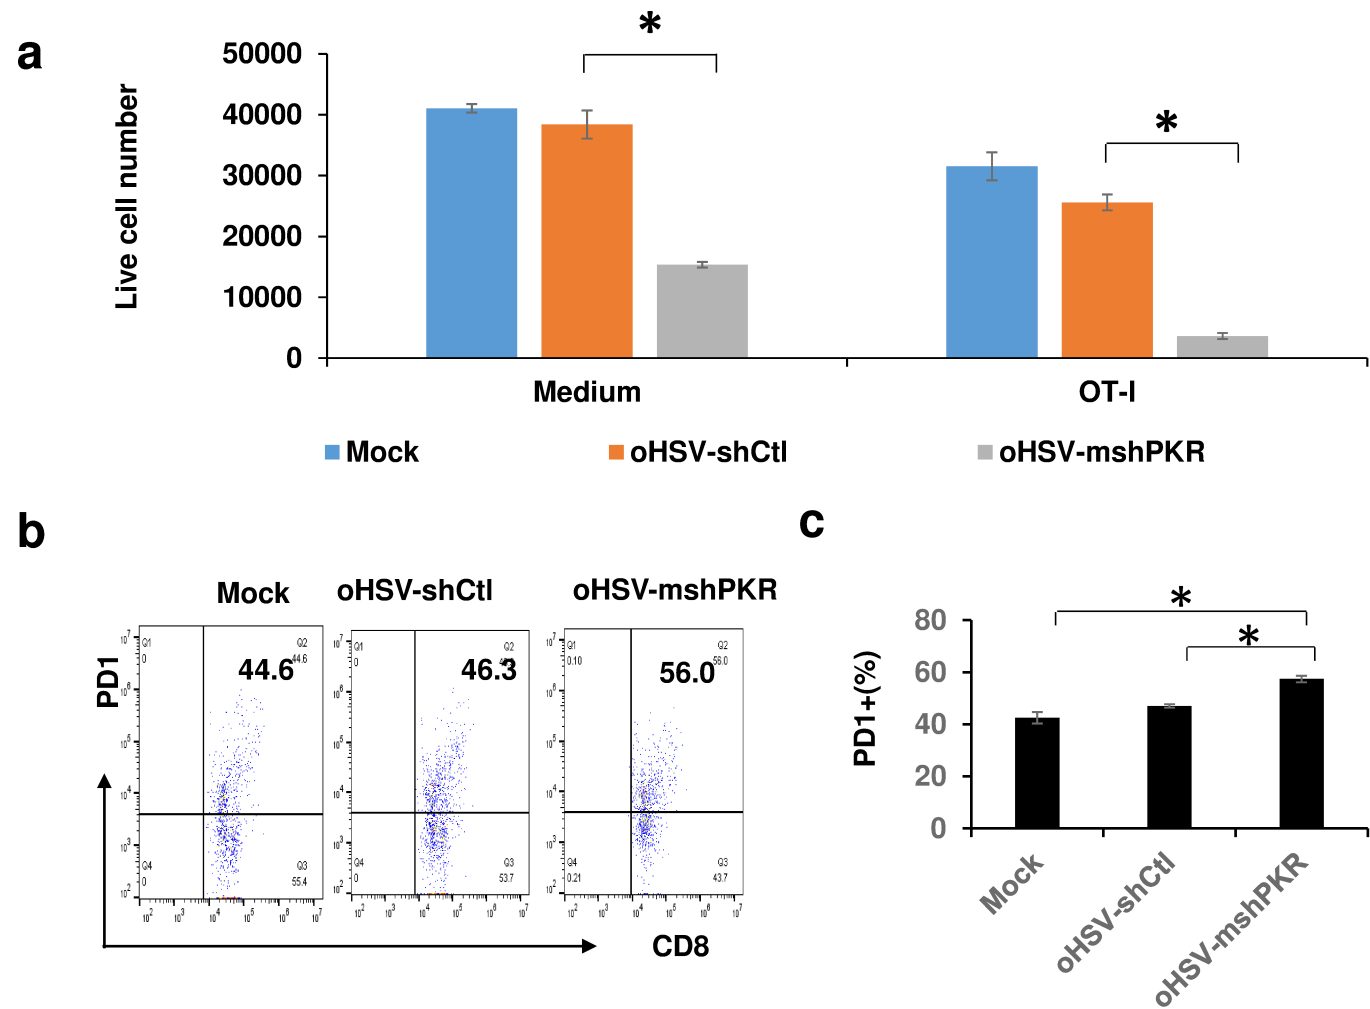

Supplementary Fig. 14

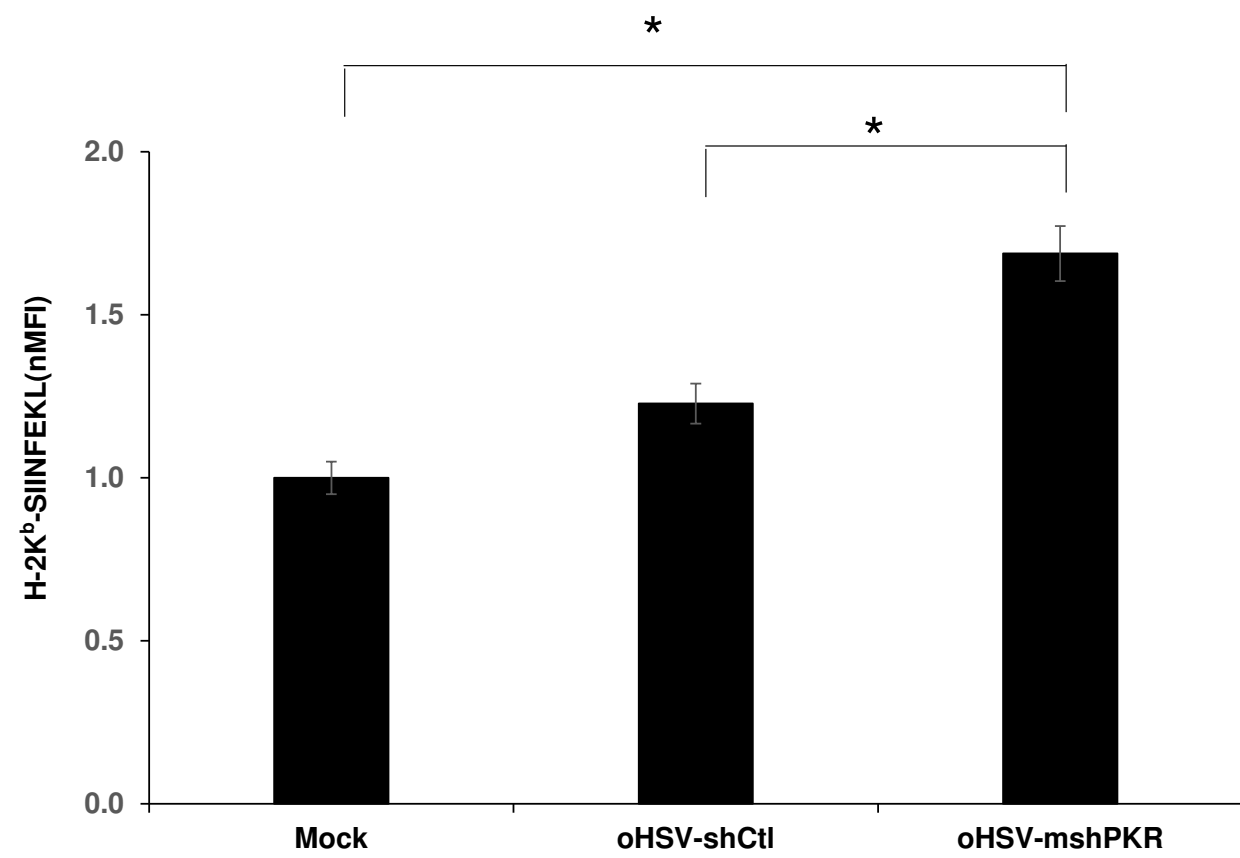

Supplementary Fig. 15

Supplementary Table 1. siRNA and shRNA sequence used in the study

| siRNA or shRNA    | Sequence                                               |
|-------------------|--------------------------------------------------------|
| Scramble siRNA    | 5'-UAAGGCUAUGAAGAGAUAC-3'                              |
| Human PKR siRNA1  | 5'-CAUCAGAGAUAAAUUCUAA-3'                              |
| Human PKR siRNA2  | 5'-GUCAGAAGCAGGGAGUAGU-3'                              |
| Murine PKR siRNA1 | 5'-CAAAGCAGUUGGCUGCGAA-3'                              |
| Murine PKR siRNA2 | 5'-GAAGGUUUACAUUUCAGU-3'                               |
| Murine PKR siRNA3 | 5'-GUGAUACAAGUCGAUACAA-3'                              |
| Scramble shRNA    | 5'-TAAGGCTATGAAGAGATActtcaagagaGTATCTCTTCATAGCCTTA-3'  |
| Human PKR shRNA1  | 5'-CATCAGAGATAAATTCTAattcaagagaTTAGAATTTATCTCTGATG-3'  |
| Human PKR shRNA2  | 5'-GTCAGAAGCAGGGAGTAGTttcaagagaACTACTCCCTGCTTCTGAC-3'  |
| Murine PKR shRNA1 | 5'- CAAAGCAGTTGGCTGCGAA ttcaagagaTTCGCAGCCAAGTCTTTG-3' |
| Murine PKR shRNA2 | 5'-GAAGGTTTACATTTCAAGTttcaagagaACTTGAAATGTAAACCTTC-3'  |
| Murine PKR shRNA3 | 5'-GTGATACAAGTCGATACAAttcaagagaTTGTATCGACTTGTATCAC-3'  |
